# Supplementary material for: Spray pyrolysis technology-based closed-loop for regenerating single-crystal cathodes from spent lithium-ion batteries
Source: Royal Society of Chemistry journal article supplement (doi:10.1039/d3gc00197k), 2023-01-01
Supplement: d3gc00197k1.pdf [file d3gc00197k1.pdf]

## Supplementary Information

### **Spray pyrolysis technology-based closed-loop for regenerating single-crystal cathodes from spent lithium-ion batteries**

Tao Li, Yongchao Zhou, Ziyu Chen, and Yan Li\*

School of Resource Environment and Safety Engineering, University of South China,  
Hengyang 421001, P. R. China

\*Corresponding Author

E-mail: [li-yan@usc.edu.cn](mailto:li-yan@usc.edu.cn)

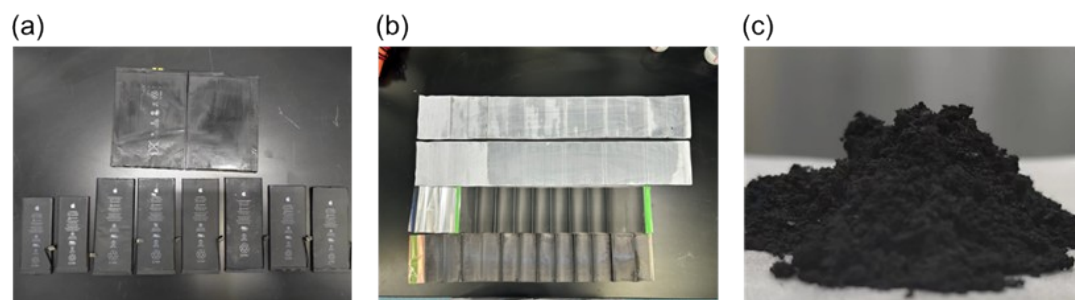

**Fig. S1** Photos of (a) spent LIBs, (b) cathodes, anodes, and separators of the batteries and (c) cathode powders after exfoliating Al foils.

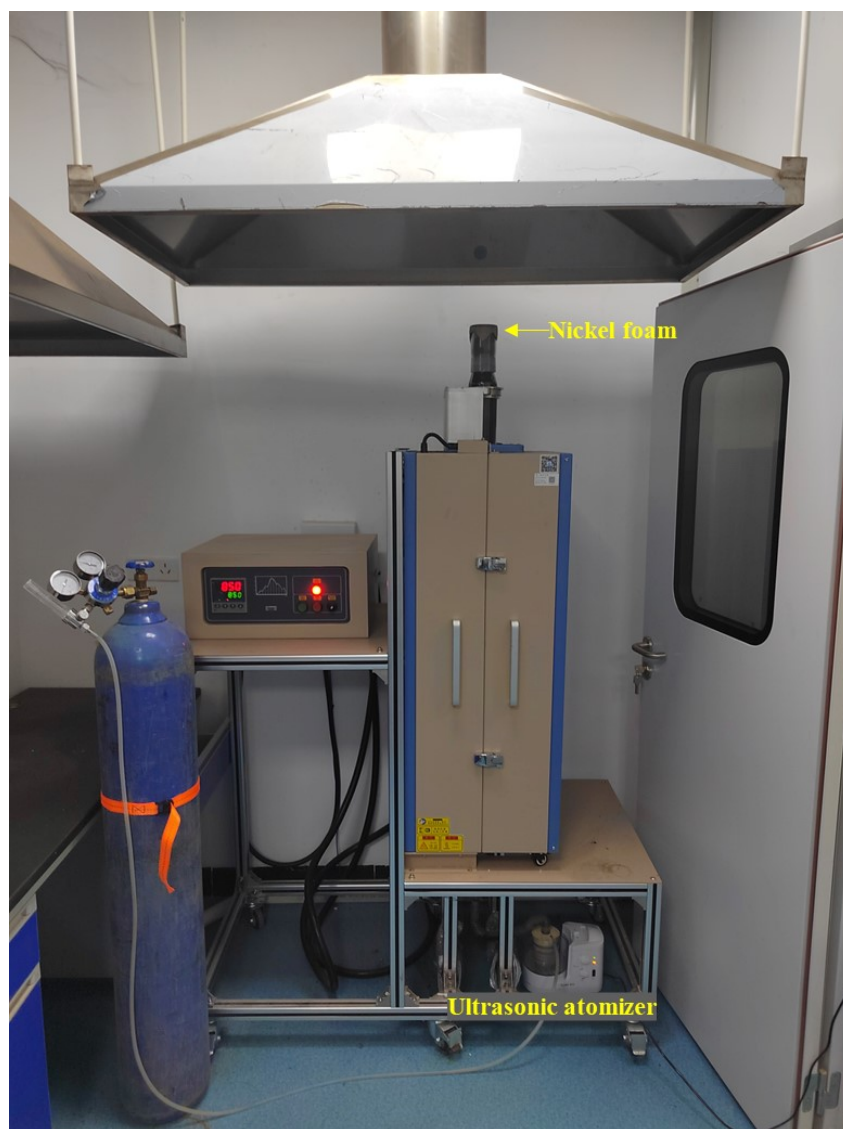

**Fig. S2** Photo of the spray pyrolysis device, mainly including a vertical furnace reactor, ultrasonic atomizer, and a powder collector (nickel foam).

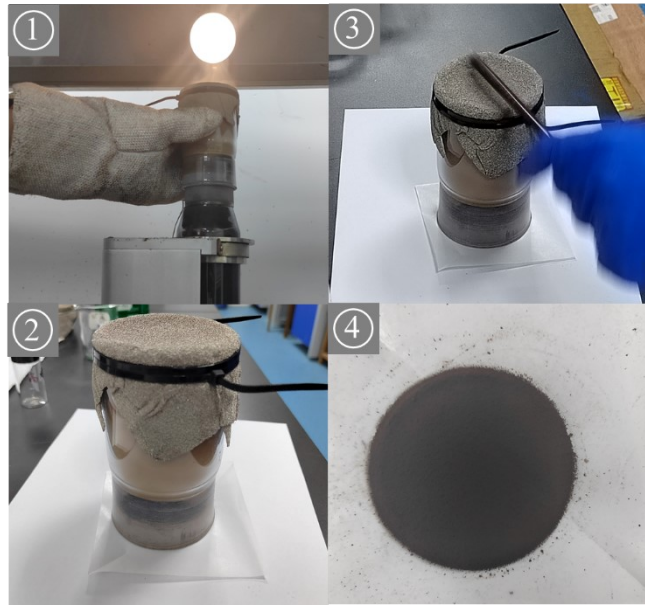

**Fig. S3** The process of powder collection.

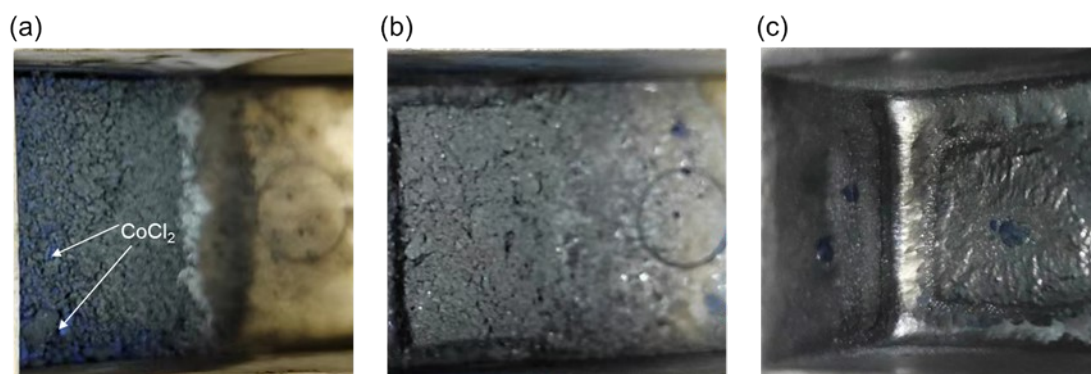

**Fig. S4** Photos of LiCl and CoCl<sub>2</sub> mixture sintered at (a) 500°C; (b) 525°C; (c) 550°C.

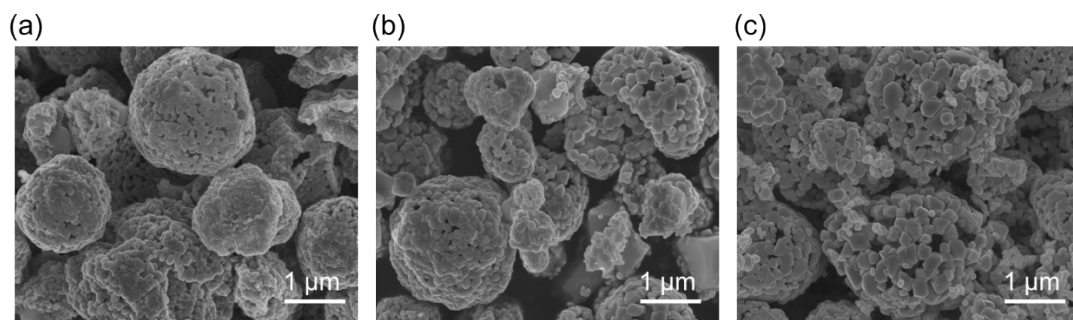

**Fig. S5** SEM images of pyrolyzed powders at (a) 650°C; (b) 750°C; (c) 850°C.

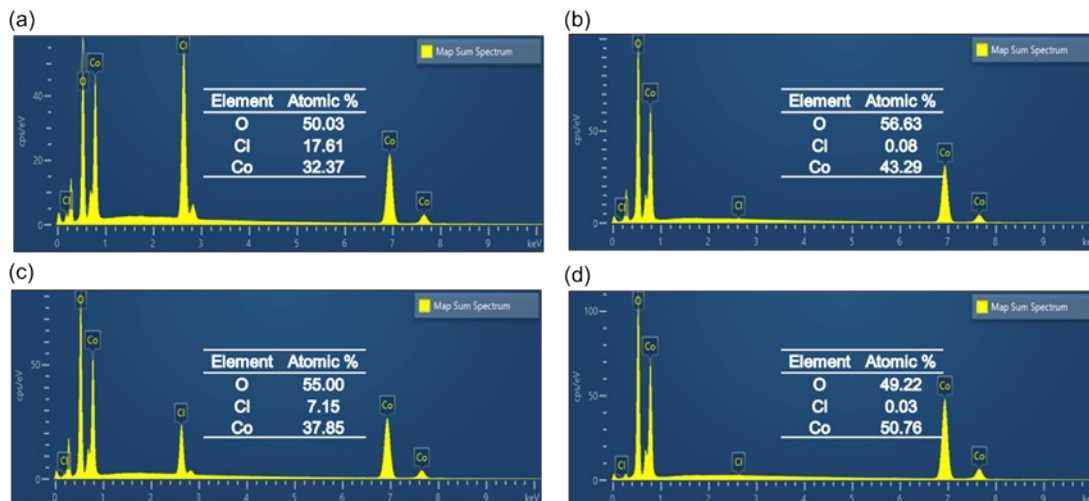

**Fig. S6** EDS diagram of (a) pyrolysis product and (b) water leaching residue at 750°C;

EDS diagram of (c) pyrolysis product and (d) water leaching residue at 850°C.

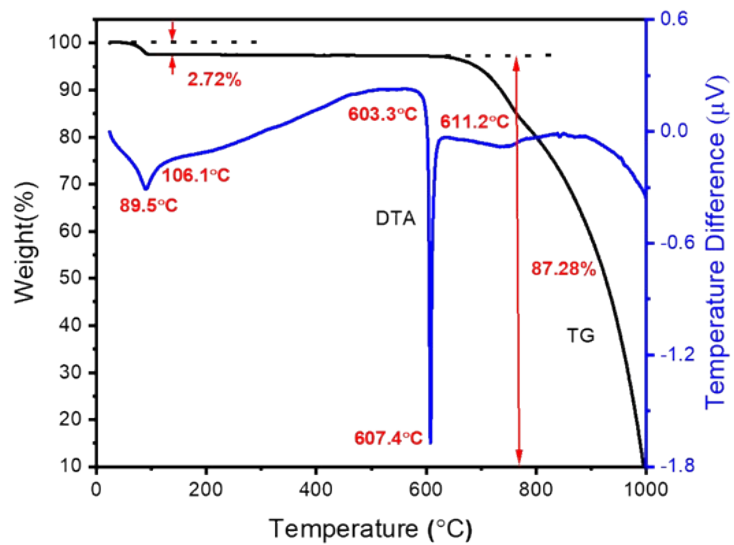

**Fig. S7** TG/DTA curves of LiCl in air.



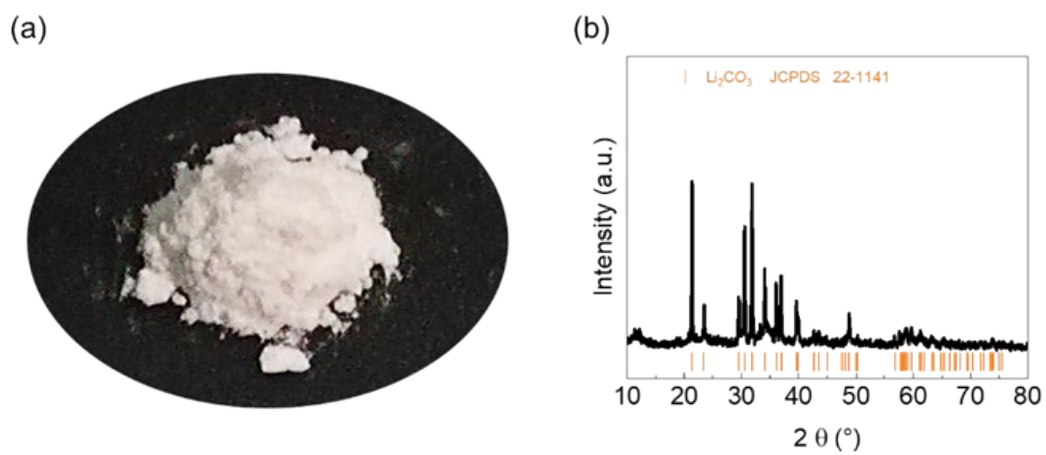

**Fig. S8** (a) Photo of the regenerated  $\text{Li}_2\text{CO}_3$ ; (b) XRD pattern of the regenerated  $\text{Li}_2\text{CO}_3$ .

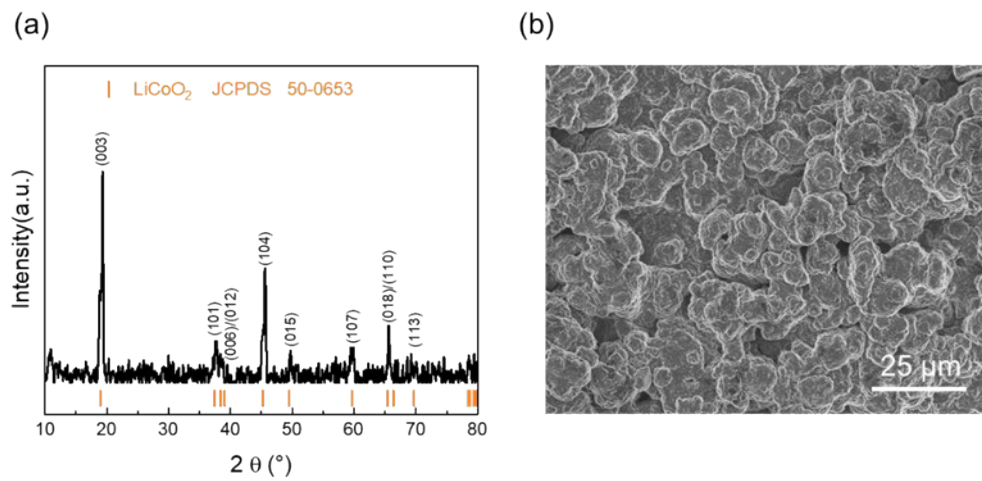

**Fig. S9** (a) XRD pattern and (b) SEM image of the cycled R-LCO electrode.

**Table S1** The Li concentration in the sample obtained at 650°C, 750°C, and 850°C.\*

| Temperature/°C                          | 650  | 750  | 850  |
|-----------------------------------------|------|------|------|
| Li concentration/ (mg L <sup>-1</sup> ) | 1.60 | 2.05 | 1.12 |

\*Note: Solution preparation for ICP measurement: 100.0 mg Co<sub>3</sub>O<sub>4</sub> residue was dissolved in HCl (7.9 mol L<sup>-1</sup>) and the volume was fixed at 50 mL. Then the solutions were measured without diluting.
